# Supplementary material
Source: PubMed Central journal article supplement (PMC3286937)
Supplement: 1112005109_pnas.1112005109_SI.pdf [file 1112005109_pnas.1112005109_SI.pdf]

# Supporting Information

Ohara et al. 10.1073/pnas.1112005109

Table S1. List of operational taxonomic units (OTUs) to reconstruct the phylogenetic tree of vesicomylid clams (Fig. 5B)

| Species name in the DNA Data | Genus              | Accession No. | Locality                                    | Depth (m)   | Habitat Type  | Reference     |
|------------------------------|--------------------|---------------|---------------------------------------------|-------------|---------------|---------------|
| Vesicomylid clam             | <i>Abyssogena</i>  | AB629938      | Shinkai Seep Field, Mariana Trench          | 5,550–5,861 | seep          | Present study |
| Vesicomylid clam             | <i>Abyssogena</i>  | AB629939      | Shinkai Seep Field, Mariana Trench          | 5,550–5,861 | seep          | Present study |
| Vesicomylid clam             | <i>Abyssogena</i>  | AB629940      | Shinkai Seep Field, Mariana Trench          | 5,550–5,861 | seep          | Present study |
| <i>Calyptogena</i> sp        | <i>Abyssogena</i>  | AF114401      | Logatchev Field, Mid-Atlantic Ridge         | 3,038       | vent          | (8)           |
| <i>Calyptogena</i> sp        | <i>Abyssogena</i>  | AF114402      | Logatchev Field, Mid-Atlantic Ridge         | 3,038       | vent          | (8)           |
| <i>Calyptogena</i> sp        | <i>Abyssogena</i>  | AF114403      | Logatchev Field, Mid-Atlantic Ridge         | 3,038       | vent          | (8)           |
| <i>Calyptogena</i> sp        | <i>Abyssogena</i>  | AF114404      | Logatchev Field, Mid-Atlantic Ridge         | 3,038       | vent          | (8)           |
| <i>Calyptogena</i> sp        | <i>Abyssogena</i>  | AF114405      | Logatchev Field, Mid-Atlantic Ridge         | 3,038       | vent          | (8)           |
| <i>Vesicomya</i> sp          | <i>Abyssogena</i>  | EU403471      | Logatchev Field, Mid-Atlantic Ridge         | 3,028       | vent          | (9)           |
| <i>Calyptogena</i> sp        | <i>Abyssogena</i>  | AF008279      | Barbados Accretionary Prism                 | 5,000       | seep          | (7)           |
| <i>Calyptogena</i> sp        | <i>Abyssogena</i>  | AF008280      | West Florida Escarpment                     | 3,313       | seep          | (7)           |
| <i>Calyptogena</i> sp        | <i>Abyssogena</i>  | AF008281      | West Florida Escarpment                     | 3,313       | seep          | (7)           |
| <i>Calyptogena</i> sp        | <i>Abyssogena</i>  | AB110774      | Ryukyu Trench                               | 5,900       | seep          | (3)           |
| <i>Calyptogena</i> sp        | <i>Abyssogena</i>  | AB110775      | Ryukyu Trench                               | 5,900       | seep          | (3)           |
| <i>C. kaikoi</i>             | <i>Abyssogena</i>  | AB110760      | Dai-san Tenryu Canyon, Nankai Trough        | 3,800       | seep          | (3)           |
| <i>C. kaikoi</i>             | <i>Abyssogena</i>  | AB110761      | Dai-san Tenryu Canyon, Nankai Trough        | 3,800       | seep          | (3)           |
| <i>C. kaikoi</i>             | <i>Abyssogena</i>  | AB110762      | Dai-san Tenryu Canyon, Nankai Trough        | 3,800       | seep          | (3)           |
| <i>C. kaikoi</i>             | <i>Abyssogena</i>  | AB110763      | Off Muroto, Nankai Trough                   | 4,800       | seep          | (3)           |
| <i>C. phaseoliformis</i>     | <i>Abyssogena</i>  | AF114398      | Edge Site, Aleutian Trench                  | 4,947       | seep          | (8)           |
| <i>C. phaseoliformis</i>     | <i>Abyssogena</i>  | AF114399      | Shumagin Site, Aleutian Trench              | 3,550       | seep          | (8)           |
| <i>C. phaseoliformis</i>     | <i>Abyssogena</i>  | AF114400      | Shumagin Site, Aleutian Trench              | 3,550       | seep          | (8)           |
| <i>C. phaseoliformis</i>     | <i>Abyssogena</i>  | AF008282      | Japan Trench                                | 6,370       | seep          | (7)           |
| <i>C. phaseoliformis</i>     | <i>Abyssogena</i>  | AF008283      | Japan Trench                                | 6,370       | seep          | (7)           |
| <i>C. phaseoliformis</i>     | <i>Abyssogena</i>  | AF008284      | Japan Trench                                | 6,370       | seep          | (7)           |
| <i>C. phaseoliformis</i>     | <i>Abyssogena</i>  | AB110764      | Kuril Trench                                | 4,700–6,200 | seep          | (3)           |
| <i>C. phaseoliformis</i>     | <i>Abyssogena</i>  | AB110765      | Kuril Trench                                | 4,700–6,200 | seep          | (3)           |
| <i>C. phaseoliformis</i>     | <i>Abyssogena</i>  | AB479088      | Kuril Trench                                | 4,819       | seep          | (6)           |
| <i>C. pacifica</i>           | <i>Calyptogena</i> | AY143290      | Heceta Bank, Oregon                         | 500         | seep          | (2)           |
| <i>C. pacifica</i>           | <i>Calyptogena</i> | AY143291      | Heceta Bank, Oregon                         | 500         | seep          | (2)           |
| <i>C. pacifica</i>           | <i>Calyptogena</i> | AY143292      | Eel River, California                       | 512         | seep          | (2)           |
| <i>C. pacifica</i>           | <i>Calyptogena</i> | AY143293      | Eel River, California                       | 512         | seep          | (2)           |
| <i>C. pacifica</i>           | <i>Calyptogena</i> | AY143294      | Eel River, California                       | 512         | seep          | (2)           |
| <i>C. pacifica</i>           | <i>Calyptogena</i> | AY143295      | Eel River, California                       | 512         | seep          | (2)           |
| <i>C. pacifica</i>           | <i>Calyptogena</i> | AY143296      | Clam Field, Monterey Bay, California        | 912         | seep          | (2)           |
| <i>C. pacifica</i>           | <i>Calyptogena</i> | AY143297      | Clam Field, Monterey Bay, California        | 912         | seep          | (2)           |
| <i>C. pacifica</i>           | <i>Calyptogena</i> | AY143298      | Clam Field, Monterey Bay, California        | 912         | seep          | (2)           |
| <i>C. pacifica</i>           | <i>Calyptogena</i> | AY143299      | Clam Field, Monterey Bay, California        | 912         | seep          | (2)           |
| <i>C. pacifica</i>           | <i>Calyptogena</i> | AY143300      | Mt. Crushmore, Monterey Bay, California     | 650         | seep          | (2)           |
| <i>C. pacifica</i>           | <i>Calyptogena</i> | AY143301      | Mt. Crushmore, Monterey Bay, California     | 650         | seep          | (2)           |
| <i>C. pacifica</i>           | <i>Calyptogena</i> | AY143302      | Mt. Crushmore, Monterey Bay, California     | 650         | seep          | (2)           |
| <i>C. pacifica</i>           | <i>Calyptogena</i> | AY143303      | Mt. Crushmore, Monterey Bay, California     | 650         | seep          | (2)           |
| <i>C. pacifica</i>           | <i>Calyptogena</i> | AY143304      | Invert Cliff, Monterey Bay, California      | 1,000       | seep          | (2)           |
| <i>C. pacifica</i>           | <i>Calyptogena</i> | AF114393      | Monterey Canyon                             | 635         | seep          | (8)           |
| <i>C. pacifica</i>           | <i>Calyptogena</i> | AF114394      | Monterey Canyon                             | 600         | seep          | (8)           |
| <i>C. pacifica</i>           | <i>Calyptogena</i> | AF008287      | Monterey Canyon                             | 600         | seep          | (7)           |
| <i>C. elongata</i>           | <i>Ectenagena</i>  | AF008273      | Santa Barbara Channel                       | 500         | seep          | (7)           |
| <i>C. elongata</i>           | <i>Ectenagena</i>  | AF008274      | Santa Barbara Channel                       | 500         | seep          | (7)           |
| <i>C. elongata</i>           | <i>Ectenagena</i>  | AF008275      | Santa Barbara Channel                       | 500         | seep          | (7)           |
| <i>C. elongata</i>           | <i>Ectenagena</i>  | AF008276      | Santa Barbara Channel                       | 500         | seep          | (7)           |
| <i>Vesicomya gigas</i>       | <i>Archivesica</i> | AF141296      | Santa Catalina Basin                        | 1,240       | whale carcass | (1)           |
| <i>Vesicomya gigas</i>       | <i>Archivesica</i> | AF141297      | Santa Catalina Basin                        | 1,240       | whale carcass | (1)           |
| <i>Vesicomya gigas</i>       | <i>Archivesica</i> | AF141298      | Santa Catalina Basin                        | 1,240       | whale carcass | (1)           |
| <i>Vesicomya gigas</i>       | <i>Archivesica</i> | AF141299      | Santa Catalina Basin                        | 1,240       | whale carcass | (1)           |
| <i>Vesicomya gigas</i>       | <i>Archivesica</i> | AF141300      | Santa Catalina Basin                        | 1,240       | whale carcass | (1)           |
| <i>Vesicomya gigas</i>       | <i>Archivesica</i> | AF141301      | Santa Catalina Basin                        | 1,240       | whale carcass | (1)           |
| <i>Vesicomya gigas</i>       | <i>Archivesica</i> | AF008261      | Guyamas Basin                               | 2,019       | vent          | (7)           |
| <i>Vesicomya gigas</i>       | <i>Archivesica</i> | AF008264      | Guyamas Basin                               | 2,000       | vent          | (7)           |
| <i>C. kawamurai</i>          | <i>Akebiconcha</i> | AB191400      | Minami Ensei Knoll, Okinawa Trough          | 640–710     | vent          | (4)           |
| <i>C. kawamurai</i>          | <i>Akebiconcha</i> | AB479089      | Suruga Bay & Nankai Trough & Okinawa Trough | 300–900     | vent & seep   | (6)           |
